# Supplementary material for: First and Second-Line Anti-Tuberculosis Drug-Resistance Patterns in Pulmonary Tuberculosis Patients in Zambia
Source: MDPI journal article supplement (doi:10.3390/antibiotics12010166), 2023-01-12
Supplement: s1 [file s1]

**Table S1: Drug resistance profiles of the MTB isolates**

| <b>Sample ID</b> | <b>Province</b> | <b>Urban/Rural</b> | <b>New/Previously treated</b> | <b>DST results</b>    | <b>Drug Resistance profile</b>                      |
|------------------|-----------------|--------------------|-------------------------------|-----------------------|-----------------------------------------------------|
| SM614            | Southern        | Urban              | new                           | RIF mono              | INH                                                 |
| SM602            | Southern        | Urban              | Previously treated            | INH mono + Secondline | INH, CFZ                                            |
| SM511            | Southern        | Urban              | Previously treated            | MDR                   | INH, RIF,                                           |
| SM606            | Eastern         | Rural              | Previously treated            | INH mono              | INH                                                 |
| SM490            | Southern        | Urban              | Previously treated            | RIF mono              | RIF                                                 |
| SM609            | Southern        | Urban              | Previously treated            | MDR                   | INH, RIF                                            |
| SM413            | Eastern         | Urban              | Previously treated            | INH Mono              | INH                                                 |
| SM615            | Eastern         | Rural              | Previously treated            | INH Mono              | INH                                                 |
| SM610            | Eastern         | Rural              | Previously treated            | MDR                   | INH, RIF                                            |
| SM386            | Eastern         | Rural              | Previously treated            | MDR + Secondline      | STR, INH, RIF, EMB                                  |
| SM621            | Eastern         | Rural              | Previously treated            | MDR + Secondline      | STR, INH, RIF, EMB                                  |
| SM695            | Southern        | Rural              | Previously treated            | INH mono              | INH                                                 |
| SM450            | Eastern         | Urban              | Previously treated            | MDR                   | INH, RIF                                            |
| SM815            | Southern        | Urban              | Previously treated            | RIF mono + Secondline | RR, CFZ<br>STR, INH, RIF, BDQ,<br>CFZ,LEVO,MOX      |
| SM613            | Eastern         | Rural              | Previously treated            | MDR + Secondline      |                                                     |
| SM500            | Eastern         | Rural              | Previously treated            | RIF mono              | RIF                                                 |
| SM505            | Southern        | Rural              | Previously treated            | MDR + Secondline      | STR, INH, RIF, MOX                                  |
| SM423            | Southern        | Urban              | Previously treated            | STR Mono              | STR                                                 |
| SM612            | Southern        | Rural              | Previously treated            | MDR                   | STR, INH, RIF                                       |
| SM601            | Southern        | Rural              | Previously treated            | MDR + Secondline      | INH, RIF, BDQ, CFZ                                  |
| SM619            | Southern        | Rural              | Previously treated            | INH mono              | INH                                                 |
| SM605            | Southern        | Urban              | Previously treated            | MDR                   | STR, INH, RIF,                                      |
| SM703            | Eastern         | Rural              | Previously treated            | INH mono              | INH                                                 |
| SM800            | Eastern         | Urban              | Previously treated            | INH mono              | INH                                                 |
| SM801            | Southern        | Urban              | Previously treated            | INH mono + Secondline | INH, BDQ,CFZ<br>STR, INH, RIF, BDQ,<br>CFZ,LEVO,MOX |
| SM802            | Eastern         | Rural              | Previously treated            | MDR + Secondline      |                                                     |
| SM805            | Eastern         | Rural              | Previously treated            | INH mono              | INH                                                 |
| SM807            | Southern        | Urban              | new                           | INH mono + Secondline | INH, BDQ,CFZ                                        |
| SM817            | Southern        | Urban              | Previously treated            | INH mono + Secondline | INH, CFZ                                            |
| SM829            | Southern        | Urban              | Previously treated            | INH mono + Secondline | INH, CFZ                                            |
| SM831            | Southern        | Urban              | new                           | MDR + Secondline      | INH, RIF, BDQ, CFZ                                  |
| SM001            | Southern        | Urban              | New                           | Suceptible            | Susceptible to all                                  |
| SM002            | Southern        | Urban              | New                           | Suceptible            | Susceptible to all                                  |
| SM004            | Southern        | Urban              | New                           | Suceptible            | Susceptible to all                                  |
| SM008            | Southern        | Urban              | New                           | Suceptible            | Susceptible to all                                  |
| SM010            | Southern        | Urban              | New                           | Suceptible            | Susceptible to all                                  |
| SM012            | Southern        | Urban              | New                           | Suceptible            | Susceptible to all                                  |
| SM013            | Southern        | Urban              | New                           | Suceptible            | Susceptible to all                                  |
| SM014            | Southern        | Urban              | New                           | Suceptible            | Susceptible to all                                  |
| SM023            | Southern        | Urban              | New                           | Suceptible            | Susceptible to all                                  |
| SM048            | Southern        | Rural              | New                           | Suceptible            | Susceptible to all                                  |
| SM053            | Southern        | Urban              | New                           | Suceptible            | Susceptible to all                                  |
| SM054            | Southern        | Rural              | New                           | Suceptible            | Susceptible to all                                  |
| SM065            | Eastern         | Urban              | New                           | Suceptible            | Susceptible to all                                  |

|       |          |       |     |            |                    |
|-------|----------|-------|-----|------------|--------------------|
| SM083 | Southern | Rural | New | Suceptible | Susceptible to all |
| SM085 | Southern | Rural | New | Suceptible | Susceptible to all |
| SM097 | Southern | Rural | New | Suceptible | Susceptible to all |
| SM106 | Southern | Rural | New | Suceptible | Susceptible to all |
| SM108 | Southern | Rural | New | Suceptible | Susceptible to all |
| SM109 | Southern | Rural | New | Suceptible | Susceptible to all |
| SM114 | Southern | Rural | New | Suceptible | Susceptible to all |
| SM143 | Eastern  | Rural | New | Suceptible | Susceptible to all |
| SM257 | Eastern  | Rural | New | Suceptible | Susceptible to all |
| SM186 | Eastern  | Rural | New | Suceptible | Susceptible to all |
| SM202 | Eastern  | Urban | New | Suceptible | Susceptible to all |
| SM255 | Eastern  | Rural | New | Suceptible | Susceptible to all |
| SM256 | Eastern  | Urban | New | Suceptible | Susceptible to all |
| SM258 | Eastern  | Urban | New | Suceptible | Susceptible to all |
| SM259 | Eastern  | Urban | New | Suceptible | Susceptible to all |
| SM277 | Southern | Rural | New | Suceptible | Susceptible to all |
| SM311 | Eastern  | Urban | New | Suceptible | Susceptible to all |
| SM312 | Eastern  | Urban | New | Suceptible | Susceptible to all |
| SM313 | Eastern  | Urban | New | Suceptible | Susceptible to all |
| SM314 | Eastern  | Urban | New | Suceptible | Susceptible to all |
| SM315 | Eastern  | Urban | New | Suceptible | Susceptible to all |
| SM316 | Eastern  | Urban | New | Suceptible | Susceptible to all |
| SM317 | Eastern  | Urban | New | Suceptible | Susceptible to all |
| SM318 | Eastern  | Rural | New | Suceptible | Susceptible to all |
| SM319 | Eastern  | Urban | New | Suceptible | Susceptible to all |
| SM320 | Eastern  | Rural | New | Suceptible | Susceptible to all |
| SM321 | Eastern  | Urban | New | Suceptible | Susceptible to all |
| SM322 | Eastern  | urban | New | Suceptible | Susceptible to all |
| SM323 | Eastern  | urban | New | Suceptible | Susceptible to all |
| SM382 | Eastern  | Urban | New | Suceptible | Susceptible to all |
| SM384 | Eastern  | Urban | New | Suceptible | Susceptible to all |
| SM385 | Eastern  | Urban | New | Suceptible | Susceptible to all |
| SM386 | Eastern  | Rural | New | Suceptible | Susceptible to all |
| SM387 | Eastern  | Urban | New | Suceptible | Susceptible to all |
| SM388 | Eastern  | Urban | New | Suceptible | Susceptible to all |
| SM389 | Eastern  | Urban | New | Suceptible | Susceptible to all |
| SM370 | Eastern  | Urban | New | Suceptible | Susceptible to all |
| SM371 | Eastern  | Urban | New | Suceptible | Susceptible to all |
| SM372 | Eastern  | Urban | New | Suceptible | Susceptible to all |
| SM373 | Eastern  | Urban | New | Suceptible | Susceptible to all |
| SM379 | Eastern  | Rural | New | Suceptible | Susceptible to all |
| SM429 | Eastern  | Urban | New | Suceptible | Susceptible to all |
| SM430 | Eastern  | Urban | New | Suceptible | Susceptible to all |
| SM431 | Eastern  | Urban | New | Suceptible | Susceptible to all |
| SM432 | Eastern  | Urban | New | Suceptible | Susceptible to all |
| SM650 | Eastern  | Urban | New | Suceptible | Susceptible to all |
| SM651 | Eastern  | Urban | New | Suceptible | Susceptible to all |
| SM653 | Eastern  | Urban | New | Suceptible | Susceptible to all |

|       |          |       |                    |            |                    |
|-------|----------|-------|--------------------|------------|--------------------|
| SM654 | Eastern  | Urban | New                | Suceptible | Susceptible to all |
| SM726 | Southern | Urban | New                | Suceptible | Susceptible to all |
| SM727 | Southern | Urgan | New                | Suceptible | Susceptible to all |
| SM715 | Southern | Rural | New                | Suceptible | Susceptible to all |
| SM433 | Eastern  | Urban | New                | Suceptible | Susceptible to all |
| SM434 | Eastern  | Urban | New                | Suceptible | Susceptible to all |
| SM452 | Eastern  | Rural | New                | Suceptible | Susceptible to all |
| SM374 | Eastern  | Rural | New                | Suceptible | Susceptible to all |
| SM376 | Eastern  | Urban | New                | Suceptible | Susceptible to all |
| SM377 | Eastern  | Rural | New                | Suceptible | Susceptible to all |
| SM378 | Eastern  | Rural | New                | Suceptible | Susceptible to all |
| SM016 | Southern | Urban | New                | Suceptible | Susceptible to all |
| SM018 | Southern | Urban | New                | Suceptible | Susceptible to all |
| SM019 | Southern | Urban | New                | Suceptible | Susceptible to all |
| SM020 | Southern | Urban | New                | Suceptible | Susceptible to all |
| SM656 | Eastern  | Urban | New                | Suceptible | Susceptible to all |
| SM803 | Southern | Urban | Previously treated | Suceptible | Susceptible to all |
| SM804 | Southern | Rural | Previously treated | Suceptible | Susceptible to all |
| SM806 | Southern | Urban | Previously treated | Suceptible | Susceptible to all |
| SM808 | Eastern  | Urban | Previously treated | Suceptible | Susceptible to all |
| SM809 | Southern | Urban | Previously treated | Suceptible | Susceptible to all |
| SM810 | Eastern  | Urban | new                | Suceptible | Susceptible to all |
| SM811 | Southern | Urban | Previously treated | Suceptible | Susceptible to all |
| SM812 | Southern | Urban | Previously treated | Suceptible | Susceptible to all |
| SM813 | Eastern  | Rural | Previously treated | Suceptible | Susceptible to all |
| SM814 | Eastern  | Rural | Previously treated | Suceptible | Susceptible to all |
| SM816 | Eastern  | Rural | Previously treated | Suceptible | Susceptible to all |
| SM818 | Southern | Urban | new                | Suceptible | Susceptible to all |
| SM819 | Southern | Urban | new                | Suceptible | Susceptible to all |
| SM820 | Eastern  | Rural | Previously treated | Suceptible | Susceptible to all |
| SM821 | Eastern  | Urban | Previously treated | Suceptible | Susceptible to all |
| SM822 | Southern | Urban | new                | Suceptible | Susceptible to all |
| SM823 | Eastern  | Urban | Previously treated | Suceptible | Susceptible to all |
| SM824 | Eastern  | Rural | Previously treated | Suceptible | Susceptible to all |
| SM827 | Eastern  | Rural | Previously treated | Suceptible | Susceptible to all |
| SM828 | Eastern  | Urban | Previously treated | Suceptible | Susceptible to all |
| SM830 | Eastern  | Urban | new                | Suceptible | Susceptible to all |
| SM832 | Eastern  | Urban | Previously treated | Suceptible | Susceptible to all |
| SM825 | Eastern  | Rural | Previously treated | Suceptible | Susceptible to all |
| SM826 | Eastern  | Rural | Previously treated | Suceptible | Susceptible to all |

---

STR- Streptomycin, INH- Isonaizid, RIF- Rifampicin, EMB- Ethambutol, BDQ- Bedaquiline, CFZ- Clofazimine, LEVO – Levofloxacin, MOX- Moxifloxacin, mono- mono-resistance
